# Supplementary material for: An amorphous niobium polysulfide based nanocomposite enables ultrastable all-solid-state lithium batteries
Source: Royal Society of Chemistry journal article supplement (doi:10.1039/d3qm00173c), 2023-01-01
Supplement: d3qm00173c1.pdf [file d3qm00173c1.pdf]

## Supporting Information

### **Amorphous niobium polysulfide based nanocomposite enables ultrastable all-solid-state lithium batteries**

*Wenrui Xie<sup>a,b</sup>, Mingyuan Chang<sup>b</sup>, Wentong Fan<sup>b</sup>, Mengli Yang<sup>b</sup>, Fuli Tian<sup>b</sup>, Xiaolin Xue<sup>a,b</sup>, Xiaolei Zhao<sup>b,c</sup>, Hao He<sup>a\*</sup>, Xiayin Yao<sup>b,c\*</sup>*

*<sup>a</sup> Key Laboratory of Materials Physics of Ministry of Education, School of Physics and Microelectronics, Zhengzhou University, Zhengzhou, Henan 450001, P. R. China*

*<sup>b</sup> Ningbo Institute of Materials Technology and Engineering, Chinese Academy of Sciences, Ningbo 315201, P.R. China*

*<sup>c</sup> Center of Materials Science and Optoelectronics Engineering, University of Chinese Academy of Sciences, Beijing 100049, P. R. China*

*\* Authors to whom correspondence should be addressed: [yaoxy@nimte.ac.cn](mailto:yaoxy@nimte.ac.cn); [hehao@zzu.edu.cn](mailto:hehao@zzu.edu.cn).*

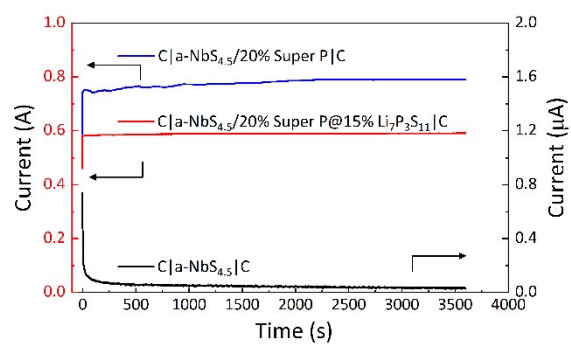

**Figure S1.** Direct current polarization curves of the C|a-NbS<sub>4.5</sub>|C, C|a-NbS<sub>4.5</sub>/20% Super P|C and C|a-NbS<sub>4.5</sub>/20% Super P@Li<sub>7</sub>P<sub>3</sub>S<sub>11</sub>|C.

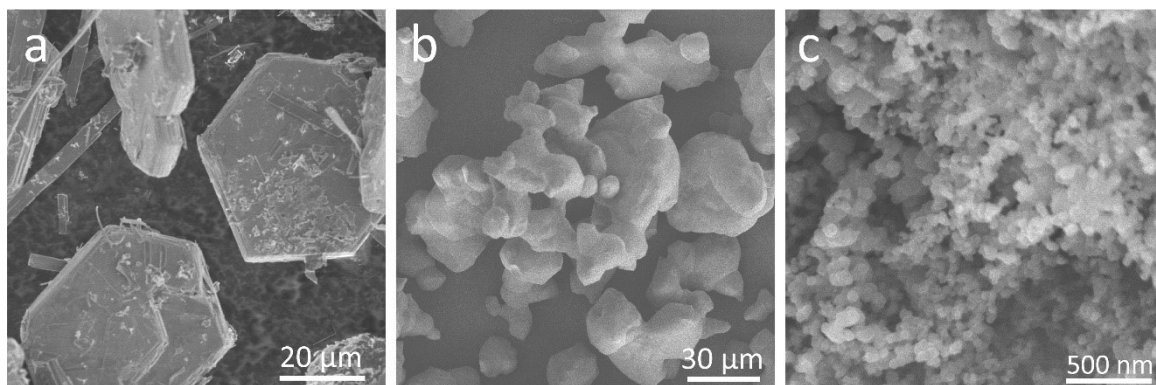

**Figure S2.** SEM images of (a) NbS<sub>2</sub>, (b) S<sub>8</sub> and (c) Super P.

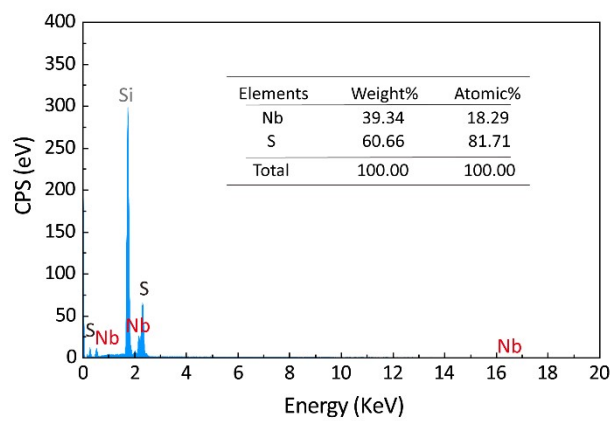

**Figure S3.** SEM-EDS analysis of a-NbS<sub>4.5</sub>. The inset is the element composition results.

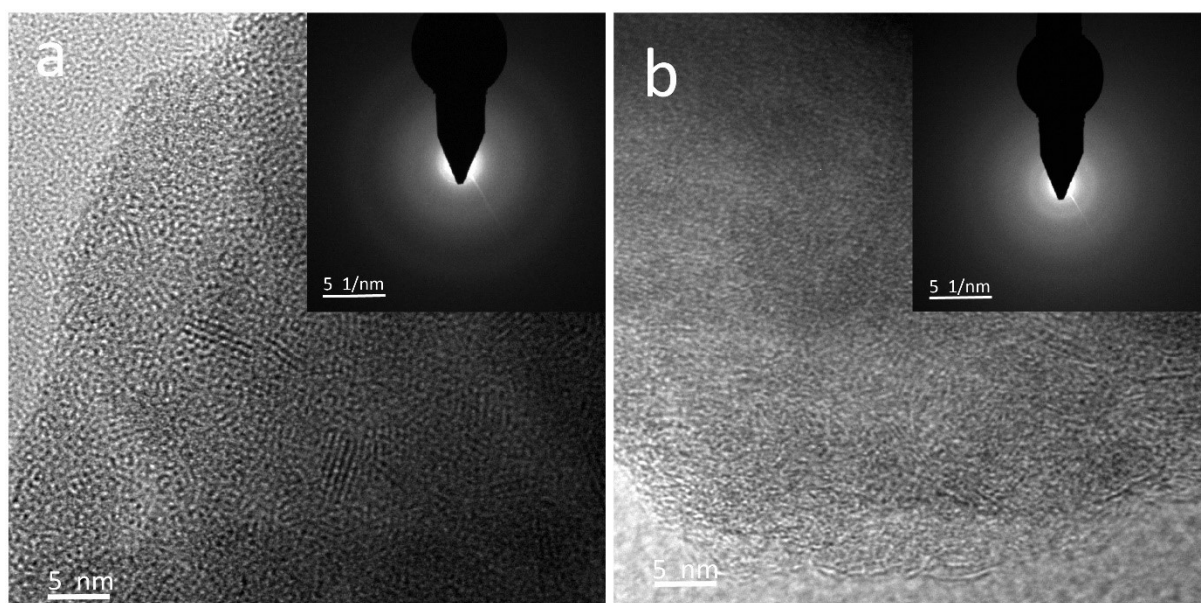

**Figure S4.** HRTEM image and SAED pattern of (a) a-NbS<sub>4.5</sub>, (b) a- NbS<sub>4.5</sub>/20% Super P sample.

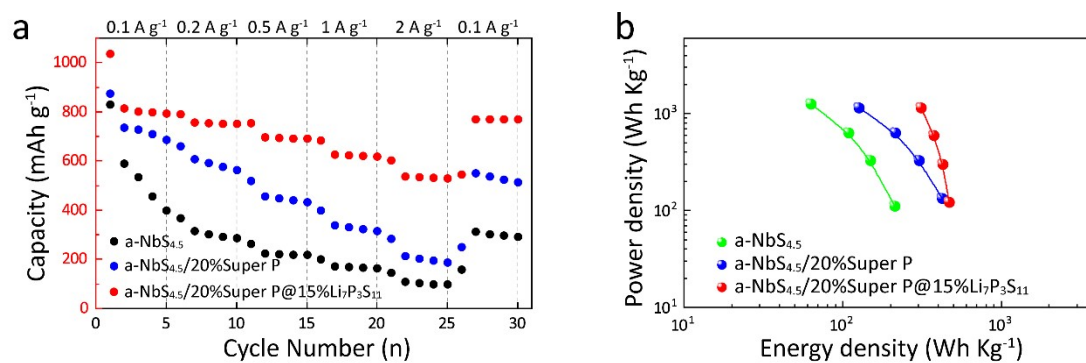

**Figure S5.** (a) Rate performances of a-NbS<sub>4.5</sub>, a-NbS<sub>4.5</sub>/20%Super P and a-NbS<sub>4.5</sub>/20%Super P@15%Li<sub>7</sub>P<sub>3</sub>S<sub>11</sub> cathodes at the current densities from 0.1 to 2 A g<sup>-1</sup>. (b) Ragone plots. The plots were derived from the discharge curves in Figure 4a-c.

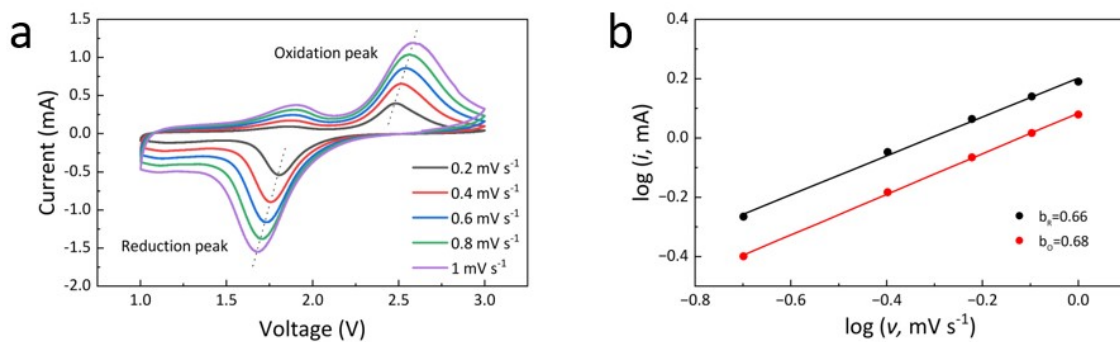

**Figure S6.** (a) CV curves of the cells using a-NbS<sub>4.5</sub>/20%Super P@15%Li<sub>7</sub>P<sub>3</sub>S<sub>11</sub> cathode at different scan rates for the second cycle. (b) The fitted lines and log (peak current) vs. log (scan rate) plots at main oxidation and reduction peaks.

**Table S1.** The fitted results of batteries after the 1st and 40th cycle.

| sample                                                                             | after 1st cycle    |                       | after 40th cycle   |                       |
|------------------------------------------------------------------------------------|--------------------|-----------------------|--------------------|-----------------------|
|                                                                                    | $R_e$ ( $\Omega$ ) | $R_{ct}$ ( $\Omega$ ) | $R_e$ ( $\Omega$ ) | $R_{ct}$ ( $\Omega$ ) |
| a-NbS <sub>4.5</sub>                                                               | 72.0               | 60.1                  | 578.5              | 236.4                 |
| a-NbS <sub>4.5</sub> /20%Super P                                                   | 69.5               | /                     | 410.8              | 101.6                 |
| a-NbS <sub>4.5</sub> /20%Super P@15%Li <sub>7</sub> P <sub>3</sub> S <sub>11</sub> | 62.5               | /                     | 155.9              | 11.5                  |
